# Supplementary material
Source: PubMed Central journal article supplement (PMC7116324)
Supplement: EMS86200-supplement-Supplemental_Figure_1.pdf [file EMS86200-supplement-Supplemental_Figure_1.pdf]

DDG-retro

RPM gated

Ungated matched

Ungated full

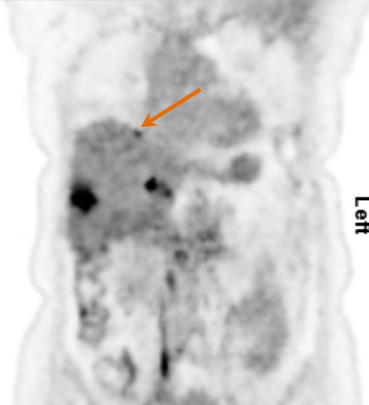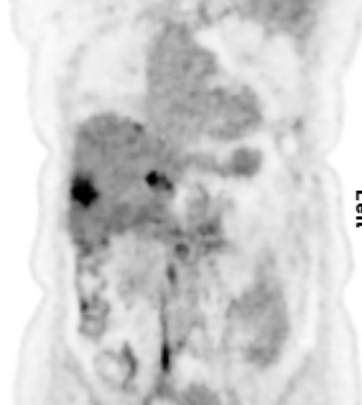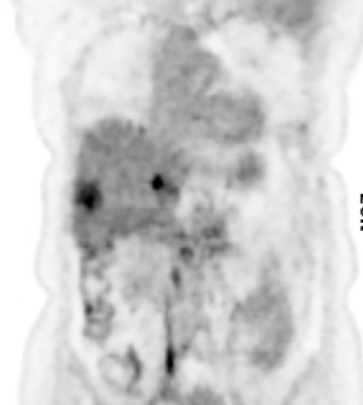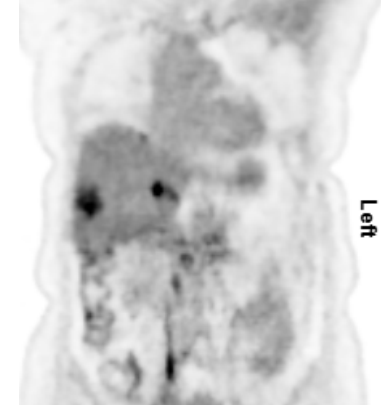

Rank: 1 (best)

2

4 (worst)

3

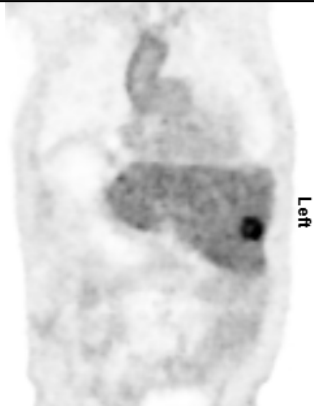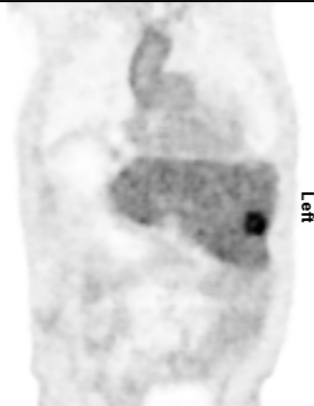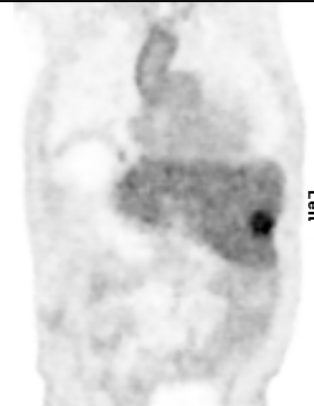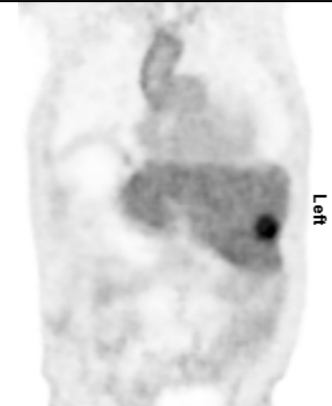

Rank: 2 (=)

2 (=)

2 (=)

1

**Supplemental Figure 1.** Two example cases, each showing a coronal slice. The image ranking provided by the radiologist (based on the whole volume) is shown below each image. In the upper image, the  $SUV_{max}$  of the lesion indicated by the arrow was 4.66, 4.16, 3.44 and 3.47 for the four images respectively (DDG-retro, RPM gated, Ungated matched, Ungated full). In the lower example, three of the images were ranked as equivalent. All images are on an SUV grayscale of 0–6.
